# Supplementary material for: Genome-Wide Constitutively Expressed Gene Analysis and New Reference Gene Selection Based on Transcriptome Data: A Case Study from Poplar/Canker Disease Interaction
Source: Front Plant Sci. 2017 Oct 31;8:1876. doi: 10.3389/fpls.2017.01876 (PMC5671478; doi:10.3389/fpls.2017.01876)
Supplement: Supplementary file 1 [file Table1.XLSX]

## Sheet: TS1.1. Poplar HK genes
Table S1.1 Commonly used poplar HK genes from previous studies: gene abbreviation, name, locus name, forward and reverse primer sequences, and amplified transcripts.
Gene abbreviation	Gene name	Locus name Phytozome v3.0	Forward primer sequences	Reverse primer sequences	Amplified transcripts in Phytozome v3.0*	Reference
60S	60S ribosomal protein L29, chloroplastic	Potri.007G093700	AGGTGAACTCTTGATGCTTCGTCTT	CTTCTCTTCCATTGCCTGTCCAACT	Potri.007G093700.1	Houling Wang, et al., 2014
ACT1	Actin	Potri.010G204300	CTCCATCATGAAATGCGATG	TTGGGGCTAGTGCTGAGATT	Potri.010G204300.1	Qingzhang Du, et al., 2013
ACT11	Actin	Potri.016G045500	CACACTGGAGTGATGGTTGG	ATTGGCCTTGGGGTTAAGAG	Potri.016G045500.1	Amy M Brunner, et al., 2004
ACT2	Actin	Potri.001G309500	CCCATTGAGCACGGTATTGT	TACGACCACTGGCATACAGG	Potri.001G309500.1	Amy M Brunner, et al., 2004
Actin(1)	Actin	Potri.001G309500	CCCAGAAGTCCTCTT	ACTGAGCACAATGTTAC	Potri.001G309500.1	Kimberley Seao Wai Lam, 2010
Actin(2)	Actin	Potri.006G192700	AAGATTCCGTTGTCCAGAGGTCCT	GAACATAGTAGAGCCACCACTGAGAAC	Potri.006G192700.1	Houling Wang, et al., 2014
ANT	AINTEGUMENTA, AP2-like ethylene-responsive transcription factor ANT,	Potri.014G008100	TCTGTCTGTTATGCCCCTCA	CCACCTAGGAAGTCCTCCAGT	Potri.014G008100.1	Emily A Pettengill, et al., 2012
CAC	Clathrin adaptor complex medium subunit	Potri.001G143800	TCACTGCTTCATTAGCCTTGTCAA	ATCAAGGAAATCAGCGGCCT	Potri.001G143800.1	Kimberley Seao Wai Lam, 2010
CDC2(1)	Cell division control protein 2	Potri.004G133500	TGAAACCTCAGAATTTGCTTA	TACCACAGGGTAACAACCTC	Potri.004G133500.1	Kimberley Seao Wai Lam, 2010
CDC2(2)	Cell division control protein 2	Potri.004G133500	ATTCCCCAAGTGGCCTTCTAAG	TATTCATGCTCCAAAGCACTCC	Potri.004G133500.1	Emily A Pettengill, et al., 2012
Chitinase	Rubber elongation factor protein (REF). This family consists of the highly related rubber elongation factor (REF), small rubber particle protein (SRPP) and stress-related protein (SRP) sequences. REF and SRPP are released from the rubber particle membrane into the cytosol during osmotic lysis of the sedimentable organelles (lutoids). The exact function of this family is unknown.	Potri.003G173100	TGGGTGTTGGTTGAAACATGA	GATATGAGAAAAAGGGTCCGCTG	Potri.003G173100.1	Kimberley Seao Wai Lam, 2010
Cpn60β	chaperonin β-subunit	Potri.001G002500	TGCTCGCAAGTGACAATCCTAAGTT	GCACCGATTCAGGCTCCTTAATGT	Potri.001G002500.1	Houling Wang, et al., 2014
CYC063	Peptidylprolyl isomerase, protein folding, CYP1.1	Potri.005G240200	CCTGGCACTAATGGGTCTCAG	CACAACTCTTCCGAACACCAC	Potri.005G240200.1	Emily A Pettengill, et al., 2012
CYP	cyclophilin	Potri.004G168800	GGCTAATTTTGCCGATGAGA	ACGTCCATCCCTTCAACAAC	Potri.004G168800.1	Amy M Brunner, et al., 2004
DGK	Diacylglycerol kinase accessory domain. Diacylglycerol (DAG) is a second messenger	Potri.018G096700	GCTGAAATCACTACCAAGCATTGT	AGGAGCTCTCCAAAACTAAAAAGGA	Potri.018G096700.1	Kimberley Seao Wai Lam, 2010
EF1β	Elongation factor 1-beta	Potri.001G224700	AAGAGGACAAGAAGGCAGCA	CTAACCGCCTTCTCCAACAC	Potri.001G224700.1	Amy M Brunner, et al., 2004
EF1𝛼(1)	Elongation factor 1-alpha	Potri.006G130900	TCCGTCTTCCACTTCAGGATGTCT	GTCACGACCATACCAGGCTTCAG	Potri.006G130900.1	Houling Wang, et al., 2014
EF1𝛼(2)	Elongation factor 1-alpha	Potri.006G130900	GGCAAGGAGAAGGTTCACAT	CAATCACACGCTTGTCAATA	Potri.006G130900.1	Wenxin Liu, et al., 2014
EF1𝛼1	Elongation factor 1-alpha	Potri.006G130900	TTTCTGCCTATCCTCCTCTTGGT	CAACCGCCACGGTCTGA	Potri.006G130900.1	Kimberley Seao Wai Lam, 2010
EF1𝛼2	Elongation factor 1-alpha	Potri.016G086500	ATTGGAAACGGATATGCTCCA	TCCTTACCTGAACGCCTGTCA	Potri.016G086500.1	Christelle M. André, et al., 2009
EF1𝛼3	Elongation factor 1-alpha	Potri.006G130900	TTTCACTCTTGGTGTGAAGCAGAT	GACTTCCTTCACGATTTCATCGTAA	Potri.006G130900.1	Mukesh Jain, et al., 2006
EIF4B-L	Similarity to eukaryotic translation initiation factor 4B	Potri.004G169100	AAAAAGGGGATTTGGGATTG	AACTTCGTCCTCGGTAGCAA	Potri.004G169100.1	Amy M Brunner, et al., 2004
eIF-5A	Eukaryotic translation initiation factor 5A	Potri.018G107300	TCGGACGAGGAGCACCACTT	TGCAAGGACGGTTCTTGATGACTAT	Potri.018G107300.1	Houling Wang, et al., 2014
GAPDH	Glyceraldehyde-3-phosphate dehydrogenase	Potri.010G055400	ATGAAGGACTGGAGAGGTGGAAGG	CACAGTAGGAACACGGAAGGACATT	Potri.010G055400.1	Houling Wang, et al., 2014
GII𝛼	Glucosidase II a-subunit	Potri.010G150700	CTCTCATTGAGCCGGCAAAT	CCCCCCTTCAAGCATAAGG	Potri.010G150700.1	Houling Wang, et al., 2014
HIS	Histone H3.3	Potri.005G072300	ACTGCTCGTAAGTCTACTGGAGG	GCGGTAACGGTGAGGCTTCTTC	Potri.005G072300.1	Houling Wang, et al., 2014
HIS2A	Histone H2A variant 1	Potri.005G216600	TTGGTGACTGTATCTGGGTTTAGG	CACAAACGCAAGCACAACATT	Potri.005G216600.1-4	Kimberley Seao Wai Lam, 2010
Latex(1)	Latex protein, MLP-like protein 328	Potri.008G131200	GCGCTTTCGTGCAACGA	CAAGATCTCCCCACAAATCACA	Potri.008G131200.1	Kimberley Seao Wai Lam, 2010
Latex(2)	Latex protein At1g14930 (Arabidopsis),MLP-like protein 328	Potri.008G131300	CTGCCGTTGCTGCTTCCT	AAGCCCGTGAATGGCACTT	Potri.008G131300.1	Kimberley Seao Wai Lam, 2010
Latex(3)	Latex protein, MLP-like protein 31	Potri.010G111000	TGAGCCCTGCCAAGATACAGA	CCGGCTTCCCCCATTC	Potri.010G111000.1	Kimberley Seao Wai Lam, 2010
LIPL	Lipocalin-like gene	Potri.018G110800	CGCCATTCTTGCCCATCATTCCT	TCCCTGTTCTTTCGCCTTCTCC	Potri.018G110800.1	Houling Wang, et al., 2014
LTP	Seed storage/lipid transfer protein	Potri.008G061800	GATCGTCCCGTGGGCTACAAGT	GATGTGAACTCCAGCAGGTTGATAGG	Potri.008G061800.1	Houling Wang, et al., 2014
MSI1(1)	WD-40 repeat-containing protein MSI1	Potri.014G179700	TTTTCCTCCAATAGATCCCGAAC	ATCCAAACAACGCACAAGCAC	Potri.014G179700.1	Kimberley Seao Wai Lam, 2010
MSI1(2)	WD-40 repeat-containing protein MSI1	Potri.014G179700	GATATACCAGCAGATGAATCAACAAAA	GTTCGGGATCTATTGGAGGAAAA	Potri.014G179700.1	Kimberley Seao Wai Lam, 2010
NPRT	Nicotinate phosphoribosyltransferase family protein/ NAPRTase family protein MNC5693726 (spruce)	Potri.005G139800	AGGCGGCTGAACCCAAC	GTACAAAGTTCCATGCACCAAATC	Potri.005G139800.1	Kimberley Seao Wai Lam, 2010
Phosphorylase	Phosphorylase	Potri.003G134500	TGTGAAGAAGAATCAGCTACTGGC	CTTAGCCTTGTTCATACTCGTGACAC	Potri.003G134500.1	Kimberley Seao Wai Lam, 2010
PMCP2	Phage minor capsid protein 2	Potri.002G127700	TCATTTGGTTTTTTTGGAAAGAGAG	ATATCATTAGCGCCAGGACTTCC	Potri.002G127700.1	Kimberley Seao Wai Lam, 2010
PP2A(1)	Serine/threonine-protein phosphatase PP2A catalytic subunit	Potri.008G191600	CATCATTCTTTATTTGGAATCTGCTGT	GGCCATTGGTGCCTTCTGT	Potri.008G191600.1	Kimberley Seao Wai Lam, 2010
PP2A(2)	Serine/threonine-protein phosphatase 2A	Potri.008G118500	CGAATGCGCGCTCTCAT	CACGGGATACAAACAAAGCAAA	Potri.008G118500.1-2	Kimberley Seao Wai Lam, 2010
PT1	Kinesin-associated protein (KAP), expressed in pollen tube cells	Potri.014G031900	GCGGAAAGAAAAACTGCAAG	TGACAGCACAGCCCAATAAG	Potri.014G031900.1	Emily A Pettengill, et al., 2012
RA	Ribulose bisphosphate carboxylase/oxygenase activase 1, chloroplastic	Potri.008G058500	GTGGGTCTCAGGTGTTGGTGTTG	CTCTTCACATTCTCTTGCTCCTTGAC	Potri.008G058500.1	Houling Wang, et al., 2014
Ran	Ran GTPase binding / chromatin binding / zinc ion binding	Potri.009G071800	CATGCGAAGAACCAGACACG	CAATGCGGTTGCTGGTGA	Potri.009G071800.1	Kimberley Seao Wai Lam, 2010
REF	Phosphorylase superfamily	Potri.013G101000	GCCGATACAGCAAGTGCTTCT	GCTAACTCCTGAGTCTGAACTTGTTTT	Potri.013G101000.1	Kimberley Seao Wai Lam, 2010
Ribosomal L15e	Ribosomal protein L15e GQ0256_J04 (white spruce)	Potri.003G078700	CTGAGTCCAGTGATGTGGCTGT	AGAAGAACACGTTCCAAGATTTCC	Potri.003G078700.1	Kimberley Seao Wai Lam, 2010
RNaseH	RNase H domain containing protein MNC5692232 (spruce)	Potri.004G129500	AAACCTGGCTGCTAATCTTAGGG	AGGGCCTGAATTACTTTCTGATACA	Potri.004G129500.1	Kimberley Seao Wai Lam, 2010
RP	60S ribosomal protein L27-3	Potri.001G342500	GTTACACGCTGGATGTGGACTTG	AACCACCTGTTCTTGCCTGTCTT	Potri.001G342500.1	Houling Wang, et al., 2014
RP-L17	Ribosomal protein L17	Potri.001G078100	GCATAAGGGAGGGTCAAATGGAAGT	TCATTCTCTGCTCTTGCCTTTACG	Potri.001G078100.1	Houling Wang, et al., 2014
SAND(1)	SAND,Trafficking protein Mon1.	Potri.009G014400	TGTCACCAGAAATTCTCAACGAA	TTCCCAACTTATACCCAATTCCA	Potri.009G014400.1	Kimberley Seao Wai Lam, 2010
SAND(2)	SAND,Trafficking protein Mon1.	Potri.009G014400	GAAGGACGACAACAAGATCAAGG	GACACTCCTGACGAGGCCAA	Potri.009G014400.1	Kimberley Seao Wai Lam, 2010
SCP-1	Synaptonemal complex protein 1 (SCP-1)	Potri.001G001300	AACTGCAGATTTGATGGATGGA	CCTCAGCTCGAAGTTTCAAAGC	Potri.001G001300.1	Kimberley Seao Wai Lam, 2010
TIF5A	Eukaryotic translation initiation factor 5A	Potri.006G185000	AACTCGCAAGGCATGTAATGG	AACTCGCAAGGCATGTAATGG	Potri.006G185000.1	Kimberley Seao Wai Lam, 2010
TIF5A-2	Eukaryotic translation initiation factor 5A	Potri.018G107300	CCCTGATGAAGGGAACTAGGTTT	TTAAGTAGCACAGACAAATGTGAAGTA GAT	Potri.018G107300.2	Kimberley Seao Wai Lam, 2010
TIF5A-3	Eukaryotic translation initiation factor 5A	Potri.008G092000	TTTATGTGGGTTTGAGAACTGGG	CCAAGAACCACAAGAATATCATTCATT	Potri.008G092000.2	Kimberley Seao Wai Lam, 2010
TIF5A-4	Eukaryotic translation initiation factor 5A	Potri.010G162800	TTTGATTGGGAGTTTTATCCGTG	GTGCCAAGAAGTGTATGCAGTCTTAC	Potri.010G162800.1	Kimberley Seao Wai Lam, 2010
TIF6	Translation initiation factor 6	Potri.005G098700	CAAGGGAACAGAGGAAATGATTG	GTGTGGGGATGGACCAGG	Potri.005G098700.1	Kimberley Seao Wai Lam, 2010
TIP4-like	TIP41-like protein	Potri.009G093200	GCTGATAATGGGGTGTCG	CAACTCTAAGCCAGAATCGC	Potri.009G093200.1	Emily A Pettengill, et al., 2012
TUA	Tubulin alpha-3/alpha-5 chain	Potri.001G004600	AGGTTCTGGTTTGGGGTCTT	TTGTCCAAAAGCACAGCAAC	Potri.001G004600.1	Amy M Brunner, et al., 2004
TUB(1)	Tubulin beta-9 chain	Potri.001G246900	GCACCAACTTGTTGAGAATGC	TTTCAACTGACCAGGGAACC	Potri.001G246900.1	Amy M Brunner, et al., 2004
TUB(2)	Tubulin beta chain	Potri.001G272800	GATTTGTCCCTCGCGCTGT	TCGGTATAATGACCCTTGGCC	Potri.001G272800.1	Kimberley Seao Wai Lam, 2010
TUB(3)	Tubulin beta-4 chain	Potri.003G126800	GGAGGTGGAACTGGATCAGGAATG	GGCATTGTAAGGCTCAACCACTGT	Potri.003G126800.1	Houling Wang, et al., 2014
UBA(1)	Ubiquitin-associated domain-containing protein 2	Potri.016G035800	GGTTTCTATGGGCTTTGATAGGAG	CCAATTCACAGCACCCATGA	Potri.016G035800.1	Kimberley Seao Wai Lam, 2010
UBA(2)	Ubiquitin-associated domain-containing family protein	Potri.006G040100	TCTTGAAGCACAGTCCCACTGA	GTTTATCTCCAAACTAACAGCCTGAA	Potri.006G040100.1	Kimberley Seao Wai Lam, 2010
UBC(1)	Ubiquitin-conjugating enzyme	Potri.018G039200	CAACCATTTGCTGTGCTTTGAA	TGACAAATGTCCATTTGGTCTCA	Potri.018G039200.1	Kimberley Seao Wai Lam, 2010
UBC(2)	Ubiquitin-conjugating enzyme	Potri.006G240900	AAAGAAAGGATGAATCTGTGCAAA TCCGTGGCATTCATCAAACTT	TCCGTGGCATTCATCAAACTT	Potri.006G240900.1	Kimberley Seao Wai Lam, 2010
UBC5	Ubiquitin-conjugating enzyme	Potri.003G136200	TTGATGTCCAGGAACAGGGTTA	CCCATGCAAAGAATCATCCAT	Potri.003G136200.1-2	Kimberley Seao Wai Lam, 2010
UBC6	Ubiquitin-conjugating enzyme.	Potri.015G023300	TTCCCCTATGTATCAATGCTTGC	GCCAGTTTTGCCCCGTTT	Potri.015G023300.1	Kimberley Seao Wai Lam, 2010
UBC9(1)	Ubiquitin-conjugating enzyme	Potri.001G094900	CAGAGACCACTTGGAGGATGAAC	ACTTCAACATTTCCGGTAATGGA	Potri.001G094900.1	Kimberley Seao Wai Lam, 2010
UBC9(2)	Ubiquitin-conjugating enzyme	Potri.004G175000	GCGTGCTGAATAAAAACAAGGA	TGTCCGAGAAATGAGAGACTCAAAT	Potri.004G175000.1	Kimberley Seao Wai Lam, 2010
UBQ(1)	Polyubiquitin (UBQ11)	Potri.001G418500	GTTGATTTTTGCTGGGAAGC	GATCTTGGCCTTCACGTTGT	Potri.001G418500.1	Amy M Brunner, et al., 2004
UBQ(2)	Ubiquitin-40S ribosomal protein S27a	Potri.014G115100	AGACCTACACCAAGCCCAAGAAGAT	CCAGCACCGCACTCAGCATTAG	Potri.014G115100.1	Houling Wang, et al., 2014
UBQ10-3	Polyubiquitin	Potri.017G036800	CCTCCGCGGTGGTTTCTAA	GGGACACAAACACCTGACCAT	Potri.017G036800.1-2	Kimberley Seao Wai Lam, 2010
UBQ10-4	Polyubiquitin,UBQ10-4 At4g05320 (Arabidopsis)	Potri.001G263000	TTGGATGGTTTCAAATAAGATTGC	AGGATGTGACATAAAATGACCAAAAG	Potri.001G263000.1	Kimberley Seao Wai Lam, 2010
UBQ10-5	Polyubiquitin 4 (UBQ4)	Potri.001G418500	GATGTGCTGTTCATGTTGTCCAA	AAGACTGCTACTGAACACACACAAGAA	Potri.001G418500.1-5	Kimberley Seao Wai Lam, 2010
UBQ10-6	Polyubiquitin (Fragment)	Potri.011G134200	CTCCGTGGTGGTTTTTAAGCTTC	CGAAAATGGCTACTGAGCACAC	Potri.011G134200.1-8	Kimberley Seao Wai Lam, 2010
UBQ10-7	Polyubiquitin 11	Potri.017G135600	TGGTTTCTGAGTCGTTATTCTGTGA	CTCGTTCCGGCCAATTCA	Potri.017G135600.1	Kimberley Seao Wai Lam, 2010
UBQ10-8	Polyubiquitin 3, Ubiquitin family	Potri.006G129600	CGTGCTCCGTCTTCGAGG	AAAAAAGAAAAGAAGAGACATAACCA CC	Potri.006G129600.1	Kimberley Seao Wai Lam, 2010
UBQ10-9	Polyubiquitin 11	Potri.011G026600	CTAAGGGTCTCTGGTTCTGCTCAA	GCTGAGACTTTTATTCAATCATTAGGAA	Potri.011G026600.1	Kimberley Seao Wai Lam, 2010
UBQ11	Polyubiquitin 4 (UBQ4)	Potri.001G418500	GCTGTTCATGTTGTCCAAGATAATG	AGACTGCTACTGAACACACACAAGAA	Potri.001G418500.1-2	Kimberley Seao Wai Lam, 2010
UBQ7	Ubiquitin-related protein 2 precursor	Potri.005G096700	GGAACGGGTTGAGGAGAAAGAAG	GCAAGAACAAGATGAAGCACAGAGC	Potri.005G096700.1	Emily A Pettengill, et al., 2012
UBQ-L	Ubiquitin 4 like (UBQ7)	Potri.005G198700	TGAGGCTTAGGGGAGGAACT	TGTAGTCGCGAGCTGTCTTG	Potri.005G198700.1	Amy M Brunner, et al., 2004
VHA-A	V-type proton ATPase catalytic subunit A	Potri.010G253500	AGTTGCATGAGGATTTGACTGCT	TGCTGTTGGTCTCATGCTGC	Potri.010G253500.1	Kimberley Seao Wai Lam, 2010
𝛼TUB	Tubulin alpha-2 chain	Potri.002G111900	TAACCGCCTTGTTTCTCAGG	CCTGGGGTATGGAACCAAGT	Potri.002G111900.1	Bittsanszky A, et al., 2007

## Sheet: TS1.2 Annotation of HK genes
Table S1.2 Functional annotation of commonly-used poplar HK genes.
Locus name Phytozome v3.0	Biotype	Position in P.trichocarpa genome	NR:Seq-id	NR:Description	NT:Seq-id	NT:Description	Uniprot:UniProtKB-AC	Uniprot:Description	COG:gene	COG:num	Pfam:pfam_ID	Pfam:pfam_Name	Pfam:pfam_Description	GO:biological_process	GO:cellular_component	GO:molecular_function	KEGG:KO	KEGG:Description
Potri.001G001300	protein_coding	Chr01:101180-104098:-	gi|224056923|ref|XP_002299091.1|	hypothetical protein POPTR_0001s03860g [Populus trichocarpa]	.	.	.	.	.	.	pfam05483	SCP-1	Synaptonemal complex protein 1 (SCP-1). Synaptonemal complex protein 1 (SCP-1) is the major component of the transverse filaments of the synaptonemal complex. Synaptonemal complexes are structures that are formed between homologous chromosomes during meiotic prophase.	.	.	.	.	.
Potri.001G002500	protein_coding	Chr01:155815-160490:+	gi|224052861|ref|XP_002297617.1|	hypothetical protein POPTR_0001s03980g [Populus trichocarpa]	.	.	Q9LJE4	Chaperonin 60 subunit beta 2, chloroplastic	alr1896	COG0459	pfam00118	Cpn60_TCP1	TCP-1/cpn60 chaperonin family. This family includes members from the HSP60 chaperone family and the TCP-1 (T-complex protein) family.	GO:0042026|protein refolding;	GO:0009507|chloroplast;GO:0009941|chloroplast envelope;GO:0009570|chloroplast stroma;GO:0022626|cytosolic ribosome;GO:0005739|mitochondrion;GO:0005730|nucleolus;GO:0005634|nucleus;	GO:0005524|ATP binding;	K04077	groEL, HSPD1; chaperonin GroEL
Potri.001G004600	protein_coding	Chr01:300313-308109:+	gi|224052904|ref|XP_002297631.1|	alpha-tubulin 2 family protein [Populus trichocarpa]	.	.	P33627	Tubulin alpha-6 chain	SPBC800.05c	COG5023	pfam03953	Tubulin_C	Tubulin C-terminal domain. This family includes the tubulin alpha, beta and gamma chains. Members of this family are involved in polymer formation. Tubulins are GTPases. FtsZ can polymerize into tubes, sheets, and rings in vitro and is ubiquitous in eubacteria and archaea. Tubulin is the major component of microtubules. (The FtsZ GTPases have been split into their won family).	GO:0007017|microtubule-based process;GO:0051258|protein polymerization;	GO:0005737|cytoplasm;GO:0005874|microtubule;	GO:0005525|GTP binding;GO:0003924|GTPase activity;GO:0005200|structural constituent of cytoskeleton;	K07374	TUBA; tubulin alpha
Potri.001G078100	protein_coding	Chr01:6172010-6174681:-	gi|224057942|ref|XP_002299401.1|	hypothetical protein POPTR_0001s11950g [Populus trichocarpa]	.	.	.	.	.	.	pfam09728	Taxilin	Myosin-like coiled-coil protein. Taxilin contains an extraordinarily long coiled-coil domain in its C-terminal half and is ubiquitously expressed. It is a novel binding partner of several syntaxin family members and is possibly involved in Ca2+-dependent exocytosis in neuroendocrine cells. Gamma-taxilin, described as leucine zipper protein Factor Inhibiting ATF4-mediated Transcription (FIAT), loc…	.	.	.	.	.
Potri.001G094900	protein_coding	Chr01:7480957-7485185:-	gi|763772011|gb|KJB39134.1|	hypothetical protein B456_007G025200, partial [Gossypium raimondii]	.	.	P35135	Ubiquitin-conjugating enzyme E2-17 kDa	SPBC119.02	COG5078	pfam00179	UQ_con	Ubiquitin-conjugating enzyme. Proteins destined for proteasome-mediated degradation may be ubiquitinated. Ubiquitination follows conjugation of ubiquitin to a conserved cysteine residue of UBC homologues. TSG101 is one of several UBC homologues that lacks this active site cysteine.	GO:0016567|protein ubiquitination;	.	GO:0005524|ATP binding;GO:0016874|ligase activity;	K06689	UBE2D_E, UBC4, UBC5; ubiquitin-conjugating enzyme E2 D/E [EC:2.3.2.23]
Potri.001G143800	protein_coding	Chr01:11681966-11688608:+	gi|566146827|ref|XP_006368418.1|	AP47/50p mRNA family protein [Populus trichocarpa]	.	.	O23140	AP-2 complex subunit mu	.	.	pfam00928	Adap_comp_sub	Adaptor complexes medium subunit family. This family also contains members which are coatomer subunits.	GO:0006897|endocytosis;GO:0006886|intracellular protein transport;	GO:0030131|clathrin adaptor complex;GO:0005905|coated pit;GO:0005794|Golgi apparatus;GO:0005886|plasma membrane;	GO:0008289|lipid binding;	K11826	AP2M1; AP-2 complex subunit mu-1
Potri.001G224700	protein_coding	Chr01:23517224-23519788:-	gi|743919658|ref|XP_011003855.1|	PREDICTED: elongation factor 1-beta 2-like [Populus euphratica]	.	.	Q9SI20	Elongation factor 1-delta 2	SPCC1450.04	COG2092	pfam00736	EF1_GNE	EF-1 guanine nucleotide exchange domain. This family is the guanine nucleotide exchange domain of EF-1 beta and EF-1 delta chains.	.	GO:0005829|cytosol;GO:0005853|eukaryotic translation elongation factor 1 complex;	GO:0003746|translation elongation factor activity;	K03232	EEF1B; elongation factor 1-beta
Potri.001G246900	protein_coding	Chr01:25730688-25732879:-	gi|224054578|ref|XP_002298330.1|	Tubulin beta-2/beta-3 chain family protein [Populus trichocarpa]	.	.	P37392	Tubulin beta-1 chain	ECU03g0820i	COG5023	pfam03953	Tubulin_C	Tubulin C-terminal domain. This family includes the tubulin alpha, beta and gamma chains. Members of this family are involved in polymer formation. Tubulins are GTPases. FtsZ can polymerize into tubes, sheets, and rings in vitro and is ubiquitous in eubacteria and archaea. Tubulin is the major component of microtubules. (The FtsZ GTPases have been split into their won family).	GO:0007017|microtubule-based process;GO:0051258|protein polymerization;	GO:0005737|cytoplasm;GO:0005874|microtubule;	GO:0005525|GTP binding;GO:0003924|GTPase activity;GO:0005200|structural constituent of cytoskeleton;	.	.
Potri.001G263000	protein_coding	Chr01:27177812-27179871:-	gi|702378204|ref|XP_010062974.1|	PREDICTED: polyubiquitin [Eucalyptus grandis]	.	.	P69322	Polyubiquitin	YLL039c	COG5272	pfam00240	ubiquitin	Ubiquitin family. This family contains a number of ubiquitin-like proteins: SUMO (smt3 homologue) Nedd8, Elongin B, Rub1, and Parkin. A number of them are thought to carry a distinctive five-residue motif termed the proteasome-interacting motif (PIM), which may have a biologically significant role in protein delivery to proteasomes and recruitment of proteasomes to transcription sites.	GO:0006511|ubiquitin-dependent protein catabolic process;	GO:0005634|nucleus;GO:0005773|vacuole;	.	K08770	UBC; ubiquitin C
Potri.001G272800	protein_coding	Chr01:27984780-27987970:+	gi|224055273|ref|XP_002298455.1|	hypothetical protein POPTR_0001s27960g [Populus trichocarpa]	.	.	P93176	Tubulin beta chain	ECU03g0820i	COG5023	pfam03953	Tubulin_C	Tubulin C-terminal domain. This family includes the tubulin alpha, beta and gamma chains. Members of this family are involved in polymer formation. Tubulins are GTPases. FtsZ can polymerize into tubes, sheets, and rings in vitro and is ubiquitous in eubacteria and archaea. Tubulin is the major component of microtubules. (The FtsZ GTPases have been split into their won family).	GO:0007017|microtubule-based process;GO:0051258|protein polymerization;	GO:0005737|cytoplasm;GO:0005874|microtubule;	GO:0005525|GTP binding;GO:0003924|GTPase activity;GO:0005200|structural constituent of cytoskeleton;	.	.
Potri.001G309500	protein_coding	Chr01:31298698-31301887:-	gi|590708352|ref|XP_007048253.1|	Actin 7 isoform 1 [Theobroma cacao]	.	.	P53492	Actin-7	SPBC32H8.12c	COG5277	pfam00022	Actin	Actin.	GO:0051301|cell division;GO:0009733|response to auxin;GO:0009416|response to light stimulus;GO:0009611|response to wounding;GO:0048364|root development;GO:0010053|root epidermal cell differentiation;GO:0048767|root hair elongation;GO:0009845|seed germination;	GO:0005618|cell wall;GO:0009941|chloroplast envelope;GO:0009570|chloroplast stroma;GO:0005856|cytoskeleton;GO:0005829|cytosol;GO:0005739|mitochondrion;GO:0005730|nucleolus;GO:0005886|plasma membrane;GO:0009506|plasmodesma;	GO:0005524|ATP binding;GO:0005200|structural constituent of cytoskeleton;	K10355	ACTF; actin, other eukaryote
Potri.001G342500	protein_coding	Chr01:34768351-34770471:+	gi|224060153|ref|XP_002300063.1|	60S ribosomal protein L27 [Populus trichocarpa]	.	.	P51419	60S ribosomal protein L27-3	YDR471w	COG2163	pfam01777	Ribosomal_L27e	Ribosomal L27e protein family. The N-terminal region of the eukaryotic ribosomal L27 has the KOW motif. C-terminal region is represented by this family.	GO:0006412|translation;	GO:0022625|cytosolic large ribosomal subunit;GO:0022626|cytosolic ribosome;	GO:0003735|structural constituent of ribosome;	.	.
Potri.001G418500	protein_coding	Chr01:44336519-44338564:+	gi|731417327|ref|XP_002267206.2|	PREDICTED: polyubiquitin-C-like [Vitis vinifera]	.	.	P0CG84	Polyubiquitin (Fragment)	YLL039c	COG5272	pfam00240	ubiquitin	Ubiquitin family. This family contains a number of ubiquitin-like proteins: SUMO (smt3 homologue) Nedd8, Elongin B, Rub1, and Parkin. A number of them are thought to carry a distinctive five-residue motif termed the proteasome-interacting motif (PIM), which may have a biologically significant role in protein delivery to proteasomes and recruitment of proteasomes to transcription sites.	GO:0006511|ubiquitin-dependent protein catabolic process;	GO:0005634|nucleus;GO:0005773|vacuole;	.	K08770	UBC; ubiquitin C
Potri.002G111900	protein_coding	Chr02:8352531-8355119:+	gi|224063401|ref|XP_002301128.1|	hypothetical protein POPTR_0002s11250g [Populus trichocarpa]	gi|566157447|ref|XM_002301092.2|	Populus trichocarpa hypothetical protein (POPTR_0002s11250g) mRNA, complete cds	Q6VAG0	Tubulin alpha-2 chain	SPBC800.05c	COG5023	pfam03953	Tubulin_C	Tubulin C-terminal domain. This family includes the tubulin alpha, beta and gamma chains. Members of this family are involved in polymer formation. Tubulins are GTPases. FtsZ can polymerize into tubes, sheets, and rings in vitro and is ubiquitous in eubacteria and archaea. Tubulin is the major component of microtubules. (The FtsZ GTPases have been split into their won family).	GO:0007017|microtubule-based process;GO:0051258|protein polymerization;	GO:0005737|cytoplasm;GO:0005874|microtubule;	GO:0005525|GTP binding;GO:0003924|GTPase activity;GO:0005200|structural constituent of cytoskeleton;	.	.
Potri.002G127700	protein_coding	Chr02:9564324-9568788:+	gi|566157721|ref|XP_002301192.2|	hypothetical protein POPTR_0002s12920g [Populus trichocarpa]	gi|566157720|ref|XM_002301156.2|	Populus trichocarpa hypothetical protein (POPTR_0002s12920g) mRNA, complete cds	.	.	.	.	pfam06152	Phage_min_cap2	Phage minor capsid protein 2. Family of related phage minor capsid proteins.	.	.	.	.	.
Potri.003G078700	protein_coding	Chr03:10675112-10677347:-	gi|743864397|ref|XP_011031909.1|	PREDICTED: 60S ribosomal protein L15 isoform X1 [Populus euphratica]	gi|566161422|ref|XM_002304249.2|	Populus trichocarpa 60S ribosomal protein L15 (POPTR_0003s07630g) mRNA, complete cds	O82528	60S ribosomal protein L15	YMR121c	COG1632	pfam00827	Ribosomal_L15e	Ribosomal L15.	GO:0006412|translation;	GO:0005840|ribosome;	GO:0003735|structural constituent of ribosome;	.	.
Potri.003G126800	protein_coding	Chr03:14760652-14762710:-	gi|224074921|ref|XP_002304492.1|	hypothetical protein POPTR_0003s12690g [Populus trichocarpa]	gi|224074920|ref|XM_002304456.1|	Populus trichocarpa hypothetical protein (POPTR_0003s12690g) mRNA, complete cds	P45960	Tubulin beta-4 chain	ECU03g0820i	COG5023	pfam03953	Tubulin_C	Tubulin C-terminal domain. This family includes the tubulin alpha, beta and gamma chains. Members of this family are involved in polymer formation. Tubulins are GTPases. FtsZ can polymerize into tubes, sheets, and rings in vitro and is ubiquitous in eubacteria and archaea. Tubulin is the major component of microtubules. (The FtsZ GTPases have been split into their won family).	GO:0007017|microtubule-based process;GO:0051258|protein polymerization;	GO:0005737|cytoplasm;GO:0005874|microtubule;	GO:0005525|GTP binding;GO:0003924|GTPase activity;GO:0005200|structural constituent of cytoskeleton;	K07375	TUBB; tubulin beta
Potri.003G134500	protein_coding	Chr03:15379900-15381837:-	gi|224075044|ref|XP_002304533.1|	hypothetical protein POPTR_0003s13440g [Populus trichocarpa]	gi|566162471|ref|XM_002304497.2|	Populus trichocarpa hypothetical protein (POPTR_0003s13440g) mRNA, complete cds	Q9STX2	3-oxo-Delta(4,5)-steroid 5-beta-reductase	.	.	.	.	.	GO:0009611|response to wounding;GO:0008202|steroid metabolic process;GO:0010051|xylem and phloem pattern formation;	GO:0005829|cytosol;	GO:0047787|delta4-3-oxosteroid 5beta-reductase activity;GO:0035671|enone reductase activity;	.	.
Potri.003G136200	protein_coding	Chr03:15506600-15510413:+	gi|566175638|ref|XP_002309194.2|	hypothetical protein POPTR_0006s11070g, partial [Populus trichocarpa]	gi|566162505|ref|XM_002303588.2|	Populus trichocarpa ubiquitin conjugating-like enzyme family protein (POPTR_0003s13600g) mRNA, complete cds	P35135	Ubiquitin-conjugating enzyme E2-17 kDa	SPBC119.02	COG5078	pfam00179	UQ_con	Ubiquitin-conjugating enzyme. Proteins destined for proteasome-mediated degradation may be ubiquitinated. Ubiquitination follows conjugation of ubiquitin to a conserved cysteine residue of UBC homologues. TSG101 is one of several UBC homologues that lacks this active site cysteine.	GO:0016567|protein ubiquitination;	.	GO:0005524|ATP binding;GO:0016874|ligase activity;	K06689	UBE2D_E, UBC4, UBC5; ubiquitin-conjugating enzyme E2 D/E [EC:2.3.2.23]
Potri.003G173100	protein_coding	Chr03:18242593-18244224:-	gi|566163145|ref|XP_002304688.2|	hypothetical protein POPTR_0003s17160g [Populus trichocarpa]	gi|566163144|ref|XM_002304652.2|	Populus trichocarpa hypothetical protein (POPTR_0003s17160g) mRNA, complete cds	Q9FYF7	REF/SRPP-like protein At1g67360	.	.	pfam05755	REF	Rubber elongation factor protein (REF). This family consists of the highly related rubber elongation factor (REF), small rubber particle protein (SRPP) and stress-related protein (SRP) sequences. REF and SRPP are released from the rubber particle membrane into the cytosol during osmotic lysis of the sedimentable organelles (lutoids). The exact function of this family is unknown.	.	GO:0005773|vacuole;	.	.	.
Potri.004G129500	protein_coding	Chr04:14319028-14325117:+	gi|224077608|ref|XP_002305325.1|	RNase H domain-containing family protein [Populus trichocarpa]	gi|566166351|ref|XM_002305289.2|	Populus trichocarpa RNase H domain-containing family protein (POPTR_0004s13455g) mRNA, complete cds	P64956	Uncharacterized protein Mb2253c	ML1637_1	COG0328	pfam13456	RVT_3	Reverse transcriptase-like. This domain is found in plants and appears to be part of a retrotransposon.	.	.	GO:0003676|nucleic acid binding;GO:0004523|RNA-DNA hybrid ribonuclease activity;	K15634	gpmB; probable phosphoglycerate mutase [EC:5.4.2.12]
Potri.004G133500	protein_coding	Chr04:15358304-15366674:-	gi|224080065|ref|XP_002306004.1|	Cell division control protein 2 1 [Populus trichocarpa]	gi|566166422|ref|XM_002305968.2|	Populus trichocarpa Cell division control protein 2 1 (POPTR_0004s14080g) mRNA, complete cds	Q38772	Cell division control protein 2 homolog A	.	.	pfam00069	Pkinase	Protein kinase domain.	GO:0051301|cell division;GO:0007067|mitotic nuclear division;	.	GO:0005524|ATP binding;GO:0004693|cyclin-dependent protein serine/threonine kinase activity;GO:0008353|RNA polymerase II carboxy-terminal domain kinase activity;	.	.
Potri.004G168800	protein_coding	Chr04:18787400-18789378:+	gi|224078105|ref|XP_002305488.1|	Peptidyl-prolyl cis-trans isomerase family protein [Populus trichocarpa]	gi|566167073|ref|XM_002305452.2|	Populus trichocarpa Peptidyl-prolyl cis-trans isomerase family protein (POPTR_0004s17610g) mRNA, complete cds	Q8W171	Peptidyl-prolyl cis-trans isomerase 1	slr1251	COG0652	pfam00160	Pro_isomerase	Cyclophilin type peptidyl-prolyl cis-trans isomerase/CLD. The peptidyl-prolyl cis-trans isomerases, also known as cyclophilins, share this domain of about 109 amino acids. Cyclophilins have been found in all organisms studied so far and catalyse peptidyl-prolyl isomerization during which the peptide bond preceding proline (the peptidyl-prolyl bond) is stabilized in the cis conformation. Mammalian…	GO:0006457|protein folding;	GO:0005737|cytoplasm;	GO:0042277|peptide binding;GO:0003755|peptidyl-prolyl cis-trans isomerase activity;	.	.
Potri.004G169100	protein_coding	Chr04:18796588-18799359:+	gi|566167077|ref|XP_002305490.2|	hypothetical protein POPTR_0004s17630g [Populus trichocarpa]	gi|566167076|ref|XM_002305454.2|	Populus trichocarpa hypothetical protein (POPTR_0004s17630g) mRNA, complete cds	.	.	.	.	pfam06273	eIF-4B	Plant specific eukaryotic initiation factor 4B. This family consists of several plant specific eukaryotic initiation factor 4B proteins.	.	.	.	.	.
Potri.004G175000	protein_coding	Chr04:19349252-19350771:+	gi|224078309|ref|XP_002305519.1|	ubiquitin conjugating-like enzyme family protein [Populus trichocarpa]	gi|566167176|ref|XM_002305483.2|	Populus trichocarpa ubiquitin conjugating-like enzyme family protein (POPTR_0004s18090g) mRNA, complete cds	P35132	SUMO-conjugating enzyme UBC9	YBR082c	COG5078	pfam00179	UQ_con	Ubiquitin-conjugating enzyme. Proteins destined for proteasome-mediated degradation may be ubiquitinated. Ubiquitination follows conjugation of ubiquitin to a conserved cysteine residue of UBC homologues. TSG101 is one of several UBC homologues that lacks this active site cysteine.	GO:0016925|protein sumoylation;	.	GO:0005524|ATP binding;GO:0016874|ligase activity;	K06689	UBE2D_E, UBC4, UBC5; ubiquitin-conjugating enzyme E2 D/E [EC:2.3.2.23]
Potri.005G072300	protein_coding	Chr05:5266155-5268040:+	gi|604319816|gb|EYU30980.1|	hypothetical protein MIMGU_mgv1a014700mg [Erythranthe guttata]	gi|566169996|ref|XM_006382831.1|	Populus trichocarpa hypothetical protein (POPTR_0005s07340g) mRNA, complete cds	Q71H73	Histone H3.3	.	.	pfam00125	Histone	Core histone H2A/H2B/H3/H4.	GO:0006007|glucose catabolic process;GO:0006605|protein targeting;	GO:0000786|nucleosome;GO:0005634|nucleus;	GO:0003677|DNA binding;	K11253	H3; histone H3
Potri.005G096700	protein_coding	Chr05:7304148-7305867:-	gi|224083970|ref|XP_002307191.1|	Ubiquitin-related protein 2 precursor [Populus trichocarpa]	gi|566170462|ref|XM_002307155.2|	Populus trichocarpa Ubiquitin-related protein 2 precursor (POPTR_0005s09940g) mRNA, complete cds	Q9SHE7	Ubiquitin-NEDD8-like protein RUB1	YLL039c	COG5272	pfam00240	ubiquitin	Ubiquitin family. This family contains a number of ubiquitin-like proteins: SUMO (smt3 homologue) Nedd8, Elongin B, Rub1, and Parkin. A number of them are thought to carry a distinctive five-residue motif termed the proteasome-interacting motif (PIM), which may have a biologically significant role in protein delivery to proteasomes and recruitment of proteasomes to transcription sites.	GO:0009693|ethylene biosynthetic process;GO:0045116|protein neddylation;GO:0009733|response to auxin;	GO:0005829|cytosol;GO:0005634|nucleus;GO:0005886|plasma membrane;	.	K12158	NEDD8; ubiquitin-like protein Nedd8
Potri.005G098700	protein_coding	Chr05:7513605-7514526:+	.	.	.	.	.	translation initiation factor 6	.	.	.	.	translation initiation factor 6	GO:0003743 | translation initiation factor activity;GO:0005634 | nucleus;GO:0005730 | nucleolus;GO:0005829 | cytosol; GO:0006413 | translational initiation;GO:0009793 | embryo development ending in seed dormancy;GO:0042256 | mature ribosome assembly;GO:0043022 | ribosome binding;GO:0071215 | cellular response to abscisic acid stimulus	GO:0003743 | translation initiation factor activity;GO:0005634 | nucleus;GO:0005730 | nucleolus;GO:0005829 | cytosol; GO:0006413 | translational initiation;GO:0009793 | embryo development ending in seed dormancy;GO:0042256 | mature ribosome assembly;GO:0043022 | ribosome binding;GO:0071215 | cellular response to abscisic acid stimulus	GO:0003743 | translation initiation factor activity;GO:0005634 | nucleus;GO:0005730 | nucleolus;GO:0005829 | cytosol; GO:0006413 | translational initiation;GO:0009793 | embryo development ending in seed dormancy;GO:0042256 | mature ribosome assembly;GO:0043022 | ribosome binding;GO:0071215 | cellular response to abscisic acid stimulus	K03264	translation initiation factor 6
Potri.005G139800	protein_coding	Chr05:11664120-11674716:+	gi|224081698|ref|XP_002306477.1|	nicotinate phosphoribosyltransferase family protein [Populus trichocarpa]	gi|566172004|ref|XM_002306441.2|	Populus trichocarpa nicotinate phosphoribosyltransferase family protein (POPTR_0005s18300g) mRNA, complete cds	Q55G10	Nicotinate phosphoribosyltransferase	SA1729	COG1488	pfam04095	NAPRTase	Nicotinate phosphoribosyltransferase (NAPRTase) family. Nicotinate phosphoribosyltransferase (EC:2.4.2.11) is the rate limiting enzyme that catalyses the first reaction in the NAD salvage synthesis. This family also includes Pre-B cell enhancing factor that is a cytokine. This family is related to Quinolinate phosphoribosyltransferase pfam01729.	GO:0009435|NAD biosynthetic process;GO:0019358|nicotinate nucleotide salvage;	.	GO:0016874|ligase activity;GO:0004516|nicotinate phosphoribosyltransferase activity;GO:0004514|nicotinate-nucleotide diphosphorylase (carboxylating) activity;	K00763	pncB, NAPRT1; nicotinate phosphoribosyltransferase [EC:6.3.4.21]
Potri.005G198700	protein_coding	Chr05:21461145-21463333:+	gi|566172649|ref|XP_002306725.2|	polyubiquitin family protein [Populus trichocarpa]	gi|566172648|ref|XM_002306689.2|	Populus trichocarpa polyubiquitin family protein (POPTR_0005s22060g) mRNA, complete cds	P0C031	Ubiquitin-NEDD8-like protein RUB2	.	.	pfam00240	ubiquitin	Ubiquitin family. This family contains a number of ubiquitin-like proteins: SUMO (smt3 homologue) Nedd8, Elongin B, Rub1, and Parkin. A number of them are thought to carry a distinctive five-residue motif termed the proteasome-interacting motif (PIM), which may have a biologically significant role in protein delivery to proteasomes and recruitment of proteasomes to transcription sites.	.	GO:0005737|cytoplasm;GO:0005634|nucleus;	.	.	.
Potri.005G216600	protein_coding	Chr05:22947795-22949910:-	gi|566156256|ref|XP_006386250.1|	hypothetical protein POPTR_0002s04720g, partial [Populus trichocarpa]	gi|566172935|ref|XM_006383620.1|	Populus trichocarpa hypothetical protein (POPTR_0005s23810g) mRNA, complete cds	O23628	Histone H2A variant 1	SPBC11B10.10c	COG5262	pfam00125	Histone	Core histone H2A/H2B/H3/H4.	GO:0042742|defense response to bacterium;GO:0016048|detection of temperature stimulus;GO:0009908|flower development;	GO:0000786|nucleosome;GO:0005634|nucleus;	GO:0003677|DNA binding;	K11251	H2A; histone H2A
Potri.005G240200	protein_coding	Chr05:24631041-24632320:+	gi|224083020|ref|XP_002306932.1|	Peptidyl-prolyl cis-trans isomerase family protein [Populus trichocarpa]	gi|118481070|gb|EF144225.1|	Populus trichocarpa clone PX0011_H09 unknown mRNA	O49886	Peptidyl-prolyl cis-trans isomerase	slr1251	COG0652	pfam00160	Pro_isomerase	Cyclophilin type peptidyl-prolyl cis-trans isomerase/CLD. The peptidyl-prolyl cis-trans isomerases, also known as cyclophilins, share this domain of about 109 amino acids. Cyclophilins have been found in all organisms studied so far and catalyse peptidyl-prolyl isomerization during which the peptide bond preceding proline (the peptidyl-prolyl bond) is stabilized in the cis conformation. Mammalian…	GO:0006457|protein folding;	GO:0005737|cytoplasm;	GO:0042277|peptide binding;GO:0003755|peptidyl-prolyl cis-trans isomerase activity;	.	.
Potri.006G040100	protein_coding	Chr06:2852444-2858810:+	gi|224086841|ref|XP_002307981.1|	ubiquitin-associated domain-containing family protein [Populus trichocarpa]	gi|566174341|ref|XM_002307945.2|	Populus trichocarpa ubiquitin-associated domain-containing family protein (POPTR_0006s03850g) mRNA, complete cds	Q8NBM4	Ubiquitin-associated domain-containing protein 2	.	.	pfam00627	UBA	UBA/TS-N domain. This small domain is composed of three alpha helices. This family includes the previously defined UBA and TS-N domains. The UBA-domain (ubiquitin associated domain) is a novel sequence motif found in several proteins having connections to ubiquitin and the ubiquitination pathway. The structure of the UBA domain consists of a compact three helix bundle. This domain is found at the…	GO:1904153|negative regulation of retrograde protein transport, ER to cytosol;GO:0070972|protein localization to endoplasmic reticulum;	GO:0005783|endoplasmic reticulum;GO:0016021|integral component of membrane;	.	.	.
Potri.006G129600	protein_coding	Chr06:10592212-10594415:+	gi|731417327|ref|XP_002267206.2|	PREDICTED: polyubiquitin-C-like [Vitis vinifera]	gi|566176084|ref|XM_006381411.1|	Populus trichocarpa polyubiquitin family protein (POPTR_0006s13160g) mRNA, complete cds	Q1EC66	Polyubiquitin 3	YLL039c	COG5272	pfam00240	ubiquitin	Ubiquitin family. This family contains a number of ubiquitin-like proteins: SUMO (smt3 homologue) Nedd8, Elongin B, Rub1, and Parkin. A number of them are thought to carry a distinctive five-residue motif termed the proteasome-interacting motif (PIM), which may have a biologically significant role in protein delivery to proteasomes and recruitment of proteasomes to transcription sites.	GO:0010224|response to UV-B;GO:0006511|ubiquitin-dependent protein catabolic process;	GO:0005634|nucleus;GO:0005773|vacuole;	.	K08770	UBC; ubiquitin C
Potri.006G130900	protein_coding	Chr06:10731255-10734596:+	gi|566176113|ref|XP_006381487.1|	hypothetical protein POPTR_0006s13310g [Populus trichocarpa]	gi|566176112|ref|XM_006381425.1|	Populus trichocarpa hypothetical protein (POPTR_0006s13310g) mRNA, complete cds	O49169	Elongation factor 1-alpha	SPCC794.09c	COG5256	pfam00009	GTP_EFTU	Elongation factor Tu GTP binding domain. This domain contains a P-loop motif, also found in several other families such as pfam00071, pfam00025 and pfam00063. Elongation factor Tu consists of three structural domains, this plus two C-terminal beta barrel domains.	.	GO:0005737|cytoplasm;	GO:0005525|GTP binding;GO:0003924|GTPase activity;GO:0003746|translation elongation factor activity;	.	.
Potri.006G185000	protein_coding	Chr06:19872886-19876133:-	gi|224088272|ref|XP_002308400.1|	eukaryotic translation initiation factor 5A isoform V family protein [Populus trichocarpa]	gi|566177159|ref|XM_002308364.2|	Populus trichocarpa eukaryotic translation initiation factor 5A isoform V family protein (POPTR_0006s19870g) mRNA, complete cds	Q9AXJ4	Eukaryotic translation initiation factor 5A	YEL034w	COG0231	pfam01287	eIF-5a	Eukaryotic elongation factor 5A hypusine, DNA-binding OB fold. eIF5A, previously thought to be an initiation factor, has been shown to be required for peptide chain elongation in yeast.	GO:0045901|positive regulation of translational elongation;GO:0045905|positive regulation of translational termination;GO:0006452|translational frameshifting;	.	GO:0043022|ribosome binding;GO:0003746|translation elongation factor activity;GO:0003743|translation initiation factor activity;	.	.
Potri.006G192700	protein_coding	Chr06:20713781-20716674:-	gi|224088196|ref|XP_002308365.1|	actin family protein [Populus trichocarpa]	gi|566177306|ref|XM_002308329.2|	Populus trichocarpa actin family protein (POPTR_0006s20710g) mRNA, complete cds	O81221	Actin	SPBC32H8.12c	COG5277	pfam00022	Actin	Actin.	.	GO:0005737|cytoplasm;GO:0005856|cytoskeleton;	GO:0005524|ATP binding;	.	.
Potri.006G240900	protein_coding	Chr06:24989592-24992843:-	gi|224092314|ref|XP_002309554.1|	ubiquitin-conjugating enzyme family protein [Populus trichocarpa]	gi|566178155|ref|XM_002309518.2|	Populus trichocarpa ubiquitin-conjugating enzyme family protein (POPTR_0006s25760g) mRNA, complete cds	Q8LGF7	Protein PEROXIN-4	.	.	pfam00179	UQ_con	Ubiquitin-conjugating enzyme. Proteins destined for proteasome-mediated degradation may be ubiquitinated. Ubiquitination follows conjugation of ubiquitin to a conserved cysteine residue of UBC homologues. TSG101 is one of several UBC homologues that lacks this active site cysteine.	GO:0006635|fatty acid beta-oxidation;GO:0007031|peroxisome organization;GO:0016558|protein import into peroxisome matrix;GO:0016567|protein ubiquitination;	GO:0005737|cytoplasm;GO:0005778|peroxisomal membrane;	GO:0005524|ATP binding;GO:0016874|ligase activity;GO:0061630|ubiquitin protein ligase activity;GO:0031625|ubiquitin protein ligase binding;GO:0004842|ubiquitin-protein transferase activity;	K10689	PEX4; peroxin-4 [EC:2.3.2.23]
Potri.007G093700	protein_coding	Chr07:12051008-12054653:+	gi|566179719|ref|XP_002310561.2|	hypothetical protein POPTR_0007s05380g [Populus trichocarpa]	gi|566179716|ref|XM_006380351.1|	Populus trichocarpa hypothetical protein (POPTR_0007s05380g) mRNA, complete cds	Q9FJP3	50S ribosomal protein L29, chloroplastic	asl4207	COG0255	pfam00831	Ribosomal_L29	Ribosomal L29 protein.	GO:0006412|translation;	GO:0009507|chloroplast;GO:0009941|chloroplast envelope;GO:0009570|chloroplast stroma;GO:0009295|nucleoid;GO:0005840|ribosome;	GO:0003735|structural constituent of ribosome;	K02904	RP-L29, rpmC; large subunit ribosomal protein L29
Potri.008G058500	protein_coding	Chr08:3506096-3509428:-	gi|566182581|ref|XP_006379606.1|	hypothetical protein POPTR_0008s05870g [Populus trichocarpa]	gi|566182576|ref|XM_002312074.2|	Populus trichocarpa hypothetical protein (POPTR_0008s05870g) mRNA, complete cds	Q40460	Ribulose bisphosphate carboxylase/oxygenase activase 1, chloroplastic	.	.	pfam00004	AAA	ATPase family associated with various cellular activities (AAA). AAA family proteins often perform chaperone-like functions that assist in the assembly, operation, or disassembly of protein complexes.	.	GO:0009570|chloroplast stroma;	GO:0005524|ATP binding;	.	.
Potri.008G061800	protein_coding	Chr08:3715997-3716768:-	gi|224101069|ref|XP_002312129.1|	protease inhibitor/seed storage/lipid transfer family protein [Populus trichocarpa]	gi|566182633|ref|XM_002312093.2|	Populus trichocarpa protease inhibitor/seed storage/lipid transfer family protein (POPTR_0008s06210g) mRNA, complete cds	.	.	.	.	pfam14368	LTP_2	Probable lipid transfer. The members of this family are probably involved in lipid transfer. The family has several highly conserved cysteines, paired in various ways.	.	.	.	.	.
Potri.008G092000	protein_coding	Chr08:5767153-5769455:-	gi|224101413|ref|XP_002312268.1|	eukaryotic translation initiation factor 5A isoform VI family protein [Populus trichocarpa]	gi|566183080|ref|XM_002312232.2|	Populus trichocarpa eukaryotic translation initiation factor 5A isoform VI family protein (POPTR_0008s09150g) mRNA, complete cds	Q9SC12	Eukaryotic translation initiation factor 5A	YEL034w	COG0231	pfam01287	eIF-5a	Eukaryotic elongation factor 5A hypusine, DNA-binding OB fold. eIF5A, previously thought to be an initiation factor, has been shown to be required for peptide chain elongation in yeast.	GO:0045901|positive regulation of translational elongation;GO:0045905|positive regulation of translational termination;GO:0006452|translational frameshifting;	.	GO:0043022|ribosome binding;GO:0003746|translation elongation factor activity;GO:0003743|translation initiation factor activity;	.	.
Potri.008G118500	protein_coding	Chr08:7638600-7645491:-	gi|224101693|ref|XP_002312385.1|	hypothetical protein POPTR_0008s11730g [Populus trichocarpa]	gi|566183506|ref|XM_002312349.2|	Populus trichocarpa hypothetical protein (POPTR_0008s11730g) mRNA, complete cds	Q38950	Serine/threonine-protein phosphatase 2A 65 kDa regulatory subunit A beta isoform	.	.	pfam13646	HEAT_2	HEAT repeats. This family includes multiple HEAT repeats.	GO:0042325|regulation of phosphorylation;GO:0034047|regulation of protein phosphatase type 2A activity;GO:0046686|response to cadmium ion;	GO:0005829|cytosol;GO:0005886|plasma membrane;	GO:0008601|protein phosphatase type 2A regulator activity;	.	.
Potri.008G131200	protein_coding	Chr08:8631059-8632295:-	gi|224101855|ref|XP_002312446.1|	putative major latex family protein [Populus trichocarpa]	gi|566183709|ref|XM_002312410.2|	Populus trichocarpa putative major latex family protein (POPTR_0008s13040g) mRNA, complete cds	Q9ZVF3	MLP-like protein 328	.	.	pfam00407	Bet_v_1	Pathogenesis-related protein Bet v I family. This family is named after Bet v 1, the major birch pollen allergen. This protein belongs to family 10 of plant pathogenesis-related proteins (PR-10), cytoplasmic proteins of 15-17 kd that are wide-spread among dicotyledonous plants. In recent years, a number of diverse plant proteins with low sequence similarity to Bet v 1 was identified. A classifica…	GO:0006952|defense response;GO:0009607|response to biotic stimulus;GO:0080184|response to phenylpropanoid;GO:0010043|response to zinc ion;GO:0010228|vegetative to reproductive phase transition of meristem;	GO:0005829|cytosol;	GO:0005507|copper ion binding;	.	.
Potri.008G131300	protein_coding	Chr08:8644847-8646005:-	gi|224101857|ref|XP_002312447.1|	hypothetical protein POPTR_0008s13050g [Populus trichocarpa]	gi|566183710|ref|XM_002312411.2|	Populus trichocarpa hypothetical protein (POPTR_0008s13050g) mRNA, complete cds	Q941R6	MLP-like protein 31	.	.	pfam00407	Bet_v_1	Pathogenesis-related protein Bet v I family. This family is named after Bet v 1, the major birch pollen allergen. This protein belongs to family 10 of plant pathogenesis-related proteins (PR-10), cytoplasmic proteins of 15-17 kd that are wide-spread among dicotyledonous plants. In recent years, a number of diverse plant proteins with low sequence similarity to Bet v 1 was identified. A classifica…	GO:0006952|defense response;GO:0009607|response to biotic stimulus;	.	.	.	.
Potri.008G191600	protein_coding	Chr08:13325425-13328341:+	gi|224100197|ref|XP_002311784.1|	type 2A protein phosphtase-II [Populus trichocarpa]	gi|566184906|ref|XM_002311748.2|	Populus trichocarpa type 2A protein phosphtase-II (POPTR_0008s19590g) mRNA, complete cds	Q9ZSE4	Serine/threonine-protein phosphatase PP2A catalytic subunit	SPBC16H5.07c	COG0639	pfam00149	Metallophos	Calcineurin-like phosphoesterase. This family includes a diverse range of phosphoesterases, including protein phosphoserine phosphatases, nucleotidases, sphingomyelin phosphodiesterases and 2'-3' cAMP phosphodiesterases as well as nucleases such as bacterial SbcD or yeast MRE11. The most conserved regions in this superfamily centre around the metal chelating residues.	.	GO:0005737|cytoplasm;	GO:0046872|metal ion binding;GO:0004721|phosphoprotein phosphatase activity;	.	.
Potri.009G014400	protein_coding	Chr09:2449308-2458177:+	gi|224106734|ref|XP_002314266.1|	SAND family protein [Populus trichocarpa]	gi|566185850|ref|XM_002314230.2|	Populus trichocarpa SAND family protein (POPTR_0009s01980g) mRNA, complete cds	Q86VX9	Vacuolar fusion protein MON1 homolog A	.	.	pfam03164	Mon1	Trafficking protein Mon1. Members of this family have been called SAND proteins although these proteins do not contain a SAND domain. In Saccharomyces cerevisiae a protein complex of Mon1 and Ccz1 functions with the small GTPase Ypt7 to mediate vesicle trafficking to the vacuole. The Mon1/Ccz1 complex is conserved in eukaryotic evolution and members of this family (previously known as DUF254) are…	GO:0009306|protein secretion;GO:0016192|vesicle-mediated transport;	GO:0005623|cell;	.	.	.
Potri.009G071800	protein_coding	Chr09:7047837-7056313:+	gi|566186818|ref|XP_002313993.2|	zinc finger family protein [Populus trichocarpa]	gi|566186817|ref|XM_002313957.2|	Populus trichocarpa zinc finger family protein (POPTR_0009s07610g) mRNA, complete cds	Q15751	Probable E3 ubiquitin-protein ligase HERC1	SPBC557.03c	COG5184	pfam08381	BRX	Transcription factor regulating root and shoot growth via Pin3. The BREVIS RADIX (BRX) domain was characterized as being a transcription factor in plants regulating the extent of cell proliferation and elongation in the growth zone of the root. BRX is rate limiting for auxin-responsive gene-expression by mediating cross-talk with the brassino-steroid pathway. BRX has a ubiquitous, although quanti…	GO:0021702|cerebellar Purkinje cell differentiation;GO:0010507|negative regulation of autophagy;GO:0050885|neuromuscular process controlling balance;GO:0031175|neuron projection development;GO:0043547|positive regulation of GTPase activity;GO:0006810|transport;	GO:0005737|cytoplasm;GO:0005829|cytosol;GO:0005794|Golgi apparatus;GO:0016020|membrane;	GO:0005086|ARF guanyl-nucleotide exchange factor activity;GO:0016874|ligase activity;GO:0004842|ubiquitin-protein transferase activity;	K10594	HERC1; E3 ubiquitin-protein ligase HERC1 [EC:2.3.2.26]
Potri.009G093200	protein_coding	Chr09:8479391-8484262:+	gi|566187167|ref|XP_002313883.2|	hypothetical protein POPTR_0009s09620g [Populus trichocarpa]	gi|566187166|ref|XM_002313847.2|	Populus trichocarpa hypothetical protein (POPTR_0009s09620g) mRNA, complete cds	Q5FW12	TIP41-like protein	.	.	pfam04176	TIP41	TIP41-like family. The TOR signalling pathway activates a cell-growth program in response to nutrients. TIP41 interacts with TAP42 and negatively regulates the TOR signaling pathway.	GO:0043009|chordate embryonic development;GO:0043066|negative regulation of apoptotic process;	GO:0005737|cytoplasm;	.	K17607	TIPRL, TIP41; type 2A phosphatase activator TIP41
Potri.010G055400	protein_coding	Chr10:8532476-8535186:+	gi|224110772|ref|XP_002315632.1|	glyceraldehyde 3-phosphate dehydrogenase family protein [Populus trichocarpa]	gi|566189436|ref|XM_006378219.1|	Populus trichocarpa hypothetical protein (POPTR_0010s06560g) mRNA, complete cds	P25858	Glyceraldehyde-3-phosphate dehydrogenase GAPC1, cytosolic	YJR009c	COG0057	pfam02800	Gp_dh_C	Glyceraldehyde 3-phosphate dehydrogenase, C-terminal domain. GAPDH is a tetrameric NAD-binding enzyme involved in glycolysis and glyconeogenesis. C-terminal domain is a mixed alpha/antiparallel beta fold.	GO:0006006|glucose metabolic process;GO:0006096|glycolytic process;	GO:0005737|cytoplasm;	GO:0004365|glyceraldehyde-3-phosphate dehydrogenase (NAD+) (phosphorylating) activity;GO:0051287|NAD binding;GO:0050661|NADP binding;	K00134	GAPDH, gapA; glyceraldehyde 3-phosphate dehydrogenase [EC:1.2.1.12]
Potri.010G111000	protein_coding	Chr10:12976947-12978219:-	gi|224111490|ref|XP_002315876.1|	Csf-2 family protein [Populus trichocarpa]	gi|566190392|ref|XM_002315840.2|	Populus trichocarpa Csf-2 family protein (POPTR_0010s12110g) mRNA, complete cds	Q941R6	MLP-like protein 31	.	.	pfam00407	Bet_v_1	Pathogenesis-related protein Bet v I family. This family is named after Bet v 1, the major birch pollen allergen. This protein belongs to family 10 of plant pathogenesis-related proteins (PR-10), cytoplasmic proteins of 15-17 kd that are wide-spread among dicotyledonous plants. In recent years, a number of diverse plant proteins with low sequence similarity to Bet v 1 was identified. A classifica…	GO:0006952|defense response;GO:0009607|response to biotic stimulus;	.	.	.	.
Potri.010G150700	protein_coding	Chr10:15923437-15924852:+	gi|224108814|ref|XP_002314977.1|	hypothetical protein POPTR_0010s16050g [Populus trichocarpa]	gi|118489735|gb|EF148708.1|	Populus trichocarpa x Populus deltoides clone WS0136_K07 unknown mRNA	Q9LUV2	Probable protein Pop3	.	.	pfam07876	Dabb	Stress responsive A/B Barrel Domain. The function of this family is unknown, but it is upregulated in response to salt stress in Populus balsamifera. It is also found at the C-terminus of an fructose 1,6-bisphosphate aldolase from Hydrogenophilus thermoluteolus. Arthrobacter nicotinovorans ORF106 is found in the pA01 plasmid, which encodes genes for molybdopterin uptake and degradation of plant a…	GO:0042742|defense response to bacterium;GO:0050832|defense response to fungus;	GO:0005829|cytosol;GO:0005886|plasma membrane;	GO:0046872|metal ion binding;	.	.
Potri.010G162800	protein_coding	Chr10:16757508-16759928:+	gi|743801828|ref|XP_011015835.1|	PREDICTED: mitotic checkpoint protein BUB3.3 [Populus euphratica]	gi|566191253|ref|XM_002314987.2|	Populus trichocarpa hypothetical protein (POPTR_0010s17020g) mRNA, complete cds	Q9AXJ4	Eukaryotic translation initiation factor 5A	YEL034w	COG0231	pfam01287	eIF-5a	Eukaryotic elongation factor 5A hypusine, DNA-binding OB fold. eIF5A, previously thought to be an initiation factor, has been shown to be required for peptide chain elongation in yeast.	GO:0045901|positive regulation of translational elongation;GO:0045905|positive regulation of translational termination;GO:0006452|translational frameshifting;	.	GO:0043022|ribosome binding;GO:0003746|translation elongation factor activity;GO:0003743|translation initiation factor activity;	.	.
Potri.010G204300	protein_coding	Chr10:19547532-19550797:-	gi|224112777|ref|XP_002316289.1|	actin family protein [Populus trichocarpa]	gi|118481118|gb|EF144249.1|	Populus trichocarpa clone PX0011_N19 unknown mRNA	P30171	Actin-97	SPBC32H8.12c	COG5277	pfam00022	Actin	Actin.	.	GO:0005737|cytoplasm;GO:0005856|cytoskeleton;	GO:0005524|ATP binding;	.	.
Potri.010G253500	protein_coding	Chr10:22432026-22439276:-	gi|224109966|ref|XP_002315371.1|	Vacuolar ATP synthase catalytic subunit A family protein [Populus trichocarpa]	gi|566192841|ref|XM_002315335.2|	Populus trichocarpa Vacuolar ATP synthase catalytic subunit A family protein (POPTR_0010s26000g) mRNA, complete cds	P09469	V-type proton ATPase catalytic subunit A	SPAC343.05	COG1155	pfam00006	ATP-synt_ab	ATP synthase alpha/beta family, nucleotide-binding domain. This family includes the ATP synthase alpha and beta subunits, the ATP synthase associated with flagella and the termination factor Rho.	GO:0015991|ATP hydrolysis coupled proton transport;GO:0046034|ATP metabolic process;	GO:0033180|proton-transporting V-type ATPase, V1 domain;	GO:0005524|ATP binding;GO:0046961|proton-transporting ATPase activity, rotational mechanism;	.	.
Potri.011G026600	protein_coding	Chr11:2157156-2159317:-	gi|721666586|ref|XP_010235843.1|	PREDICTED: polyubiquitin 11 isoform X1 [Brachypodium distachyon]	gi|224116109|ref|XM_002317177.1|	Populus trichocarpa polyubiquitin family protein (POPTR_0011s00360g) mRNA, complete cds	P0CH33	Polyubiquitin 11	YLL039c	COG5272	pfam00240	ubiquitin	Ubiquitin family. This family contains a number of ubiquitin-like proteins: SUMO (smt3 homologue) Nedd8, Elongin B, Rub1, and Parkin. A number of them are thought to carry a distinctive five-residue motif termed the proteasome-interacting motif (PIM), which may have a biologically significant role in protein delivery to proteasomes and recruitment of proteasomes to transcription sites.	GO:0006511|ubiquitin-dependent protein catabolic process;	GO:0005737|cytoplasm;GO:0005634|nucleus;	.	K08770	UBC; ubiquitin C
Potri.011G134200	protein_coding	Chr11:15858102-15860925:+	gi|778720490|ref|XP_011658163.1|	PREDICTED: LOW QUALITY PROTEIN: polyubiquitin-like [Cucumis sativus]	gi|156523304|gb|AC209033.1|	Populus trichocarpa clone POP003-A05, complete sequence	P0CG84	Polyubiquitin (Fragment)	YLL039c	COG5272	pfam00240	ubiquitin	Ubiquitin family. This family contains a number of ubiquitin-like proteins: SUMO (smt3 homologue) Nedd8, Elongin B, Rub1, and Parkin. A number of them are thought to carry a distinctive five-residue motif termed the proteasome-interacting motif (PIM), which may have a biologically significant role in protein delivery to proteasomes and recruitment of proteasomes to transcription sites.	GO:0006511|ubiquitin-dependent protein catabolic process;	GO:0005634|nucleus;GO:0005773|vacuole;	.	K08770	UBC; ubiquitin C
Potri.013G101000	protein_coding	Chr13:11347121-11349338:-	gi|566200475|ref|XP_006376159.1|	hypothetical protein POPTR_0013s10350g [Populus trichocarpa]	gi|566200474|ref|XM_006376097.1|	Populus trichocarpa hypothetical protein (POPTR_0013s10350g) mRNA, complete cds	Q09117	Bark storage protein B	CC2266	COG0775	pfam01048	PNP_UDP_1	Phosphorylase superfamily. Members of this family include: purine nucleoside phosphorylase (PNP) Uridine phosphorylase (UdRPase) 5'-methylthioadenosine phosphorylase (MTA phosphorylase)	GO:0009116|nucleoside metabolic process;	.	GO:0003824|catalytic activity;GO:0045735|nutrient reservoir activity;	.	.
Potri.014G008100	protein_coding	Chr14:835634-839222:+	gi|566201793|ref|XP_002320013.2|	hypothetical protein POPTR_0014s01260g [Populus trichocarpa]	gi|566201792|ref|XM_002319977.2|	Populus trichocarpa hypothetical protein (POPTR_0014s01260g) mRNA, complete cds	Q38914	AP2-like ethylene-responsive transcription factor ANT	.	.	pfam00847	AP2	AP2 domain. This 60 amino acid residue domain can bind to DNA and is found in transcription factor proteins.	GO:0009908|flower development;GO:0010492|maintenance of shoot apical meristem identity;GO:0042127|regulation of cell proliferation;GO:0006351|transcription, DNA-templated;	GO:0005634|nucleus;	GO:0003677|DNA binding;GO:0003700|transcription factor activity, sequence-specific DNA binding;	K09285	OVM, ANT; AP2-like factor, ANT lineage
Potri.014G031900	protein_coding	Chr14:2653451-2658133:+	gi|566202177|ref|XP_006374963.1|	hypothetical protein POPTR_0014s03160g [Populus trichocarpa]	gi|566202176|ref|XM_006374901.1|	Populus trichocarpa hypothetical protein (POPTR_0014s03160g) mRNA, complete cds	.	.	.	.	pfam05804	KAP	Kinesin-associated protein (KAP). This family consists of several eukaryotic kinesin-associated (KAP) proteins. Kinesins are intracellular multimeric transport motor proteins that move cellular cargo on microtubule tracks. It has been shown that the sea urchin KRP85/95 holoenzyme associates with a KAP115 non-motor protein, forming a heterotrimeric complex in vitro, called the Kinesin-II.	.	.	.	.	.
Potri.014G115100	protein_coding	Chr14:8971660-8972741:-	gi|357519213|ref|XP_003629895.1|	Ubiquitin [Medicago truncatula]	gi|566203697|ref|XM_002320914.2|	Populus trichocarpa ubiquitin/ribosomal protein 27a (POPTR_0014s11040g) mRNA, complete cds	P62981	Ubiquitin-40S ribosomal protein S27a	SPAC1805.12c_1	COG5272	pfam00240	ubiquitin	Ubiquitin family. This family contains a number of ubiquitin-like proteins: SUMO (smt3 homologue) Nedd8, Elongin B, Rub1, and Parkin. A number of them are thought to carry a distinctive five-residue motif termed the proteasome-interacting motif (PIM), which may have a biologically significant role in protein delivery to proteasomes and recruitment of proteasomes to transcription sites.	GO:0006412|translation;	GO:0005634|nucleus;GO:0005840|ribosome;	GO:0046872|metal ion binding;GO:0003735|structural constituent of ribosome;	.	.
Potri.014G179700	protein_coding	Chr14:14861031-14863721:+	gi|224129418|ref|XP_002320581.1|	hypothetical protein POPTR_0014s17790g [Populus trichocarpa]	gi|566204856|ref|XM_002320545.2|	Populus trichocarpa hypothetical protein (POPTR_0014s17790g) mRNA, complete cds	O22466	WD-40 repeat-containing protein MSI1	.	.	pfam12265	CAF1C_H4-bd	Histone-binding protein RBBP4 or subunit C of CAF1 complex. The CAF-1 complex is a conserved heterotrimeric protein complex that promotes histone H3 and H4 deposition onto newly synthesized DNA during replication or DNA repair; specifically it facilitates replication-dependent nucleosome assembly with the major histone H3 (H3.1). This domain is an alpha helix which sits just upstream of the WD40 …	.	GO:0005634|nucleus;	.	K10752	RBBP4, HAT2, CAF1, MIS16; histone-binding protein RBBP4
Potri.015G023300	protein_coding	Chr15:1808999-1813460:-	gi|596009469|ref|XP_007218529.1|	hypothetical protein PRUPE_ppa012628mg [Prunus persica]	gi|566206124|ref|XM_006374262.1|	Populus trichocarpa ubiquitin conjugating-like enzyme family protein (POPTR_0015s06060g) mRNA, complete cds	P35132	SUMO-conjugating enzyme UBC9	SPBC119.02	COG5078	pfam00179	UQ_con	Ubiquitin-conjugating enzyme. Proteins destined for proteasome-mediated degradation may be ubiquitinated. Ubiquitination follows conjugation of ubiquitin to a conserved cysteine residue of UBC homologues. TSG101 is one of several UBC homologues that lacks this active site cysteine.	GO:0016925|protein sumoylation;	.	GO:0005524|ATP binding;GO:0016874|ligase activity;	K06689	UBE2D_E, UBC4, UBC5; ubiquitin-conjugating enzyme E2 D/E [EC:2.3.2.23]
Potri.016G035800	protein_coding	Chr16:2103648-2109134:-	gi|566208483|ref|XP_006373701.1|	ubiquitin-associated domain-containing family protein [Populus trichocarpa]	gi|566208482|ref|XM_006373639.1|	Populus trichocarpa ubiquitin-associated domain-containing family protein (POPTR_0016s03500g) mRNA, complete cds	Q5ZJQ8	Ubiquitin-associated domain-containing protein 2	.	.	pfam04511	DER1	Der1-like family. The endoplasmic reticulum (ER) of the yeast Saccharomyces cerevisiae contains of proteolytic system able to selectively degrade misfolded lumenal secretory proteins. For examination of the components involved in this degradation process, mutants were isolated. They could be divided into four complementation groups. The mutations led to stabilisation of two different substrates f…	GO:0070972|protein localization to endoplasmic reticulum;	GO:0005783|endoplasmic reticulum;GO:0016021|integral component of membrane;	.	.	.
Potri.016G045500	protein_coding	Chr16:2874664-2877484:+	gi|224088196|ref|XP_002308365.1|	actin family protein [Populus trichocarpa]	gi|566208665|ref|XM_002322628.2|	Populus trichocarpa actin family protein (POPTR_0016s04470g) mRNA, complete cds	O81221	Actin	SPBC32H8.12c	COG5277	pfam00022	Actin	Actin.	.	GO:0005737|cytoplasm;GO:0005856|cytoskeleton;	GO:0005524|ATP binding;	.	.
Potri.016G086500	protein_coding	Chr16:6828407-6831509:-	gi|313585338|gb|ADR70874.1|	eukaryotic translation elongation factor 1-alpha [Hevea brasiliensis]	gi|566176112|ref|XM_006381425.1|	Populus trichocarpa hypothetical protein (POPTR_0006s13310g) mRNA, complete cds	O49169	Elongation factor 1-alpha	SPCC794.09c	COG5256	pfam00009	GTP_EFTU	Elongation factor Tu GTP binding domain. This domain contains a P-loop motif, also found in several other families such as pfam00071, pfam00025 and pfam00063. Elongation factor Tu consists of three structural domains, this plus two C-terminal beta barrel domains.	.	GO:0005737|cytoplasm;	GO:0005525|GTP binding;GO:0003924|GTPase activity;GO:0003746|translation elongation factor activity;	K03231	EEF1A; elongation factor 1-alpha
Potri.017G036800	protein_coding	Chr17:3080012-3085015:-	gi|727645228|ref|XP_010493589.1|	PREDICTED: polyubiquitin-like [Camelina sativa]	gi|566211787|ref|XM_006372884.1|	Populus trichocarpa UBIQUITIN 11 family protein (POPTR_0017s06450g) mRNA, complete cds	P69322	Polyubiquitin	YLL039c	COG5272	pfam05691	Raffinose_syn	Raffinose synthase or seed imbibition protein Sip1. This family consists of several raffinose synthase proteins, also known as seed imbibition (Sip1) proteins. Raffinose (O-alpha- D-galactopyranosyl- (1-->6)- O-alpha- D-glucopyranosyl-(1<-->2)- O-beta- D-fructofuranoside) is a widespread oligosaccharide in plant seeds and other tissues. Raffinose synthase (EC:2.4.1.82) is the key enzyme that chan…	GO:0006511|ubiquitin-dependent protein catabolic process;	GO:0005634|nucleus;GO:0005773|vacuole;	.	K08770	UBC; ubiquitin C
Potri.017G135600	protein_coding	Chr17:14459552-14461566:-	gi|566210886|ref|XP_006372519.1|	polyubiquitin family protein [Populus trichocarpa]	gi|566210885|ref|XM_006372457.1|	Populus trichocarpa polyubiquitin family protein (POPTR_0017s02410g) mRNA, complete cds	P0CH33	Polyubiquitin 11	YLL039c	COG5272	pfam00240	ubiquitin	Ubiquitin family. This family contains a number of ubiquitin-like proteins: SUMO (smt3 homologue) Nedd8, Elongin B, Rub1, and Parkin. A number of them are thought to carry a distinctive five-residue motif termed the proteasome-interacting motif (PIM), which may have a biologically significant role in protein delivery to proteasomes and recruitment of proteasomes to transcription sites.	GO:0006511|ubiquitin-dependent protein catabolic process;	GO:0005634|nucleus;GO:0005773|vacuole;	.	K08770	UBC; ubiquitin C
Potri.018G039200	protein_coding	Chr18:3234729-3238309:+	gi|224142994|ref|XP_002324810.1|	ubiquitin-conjugating enzyme family protein [Populus trichocarpa]	gi|224142993|ref|XM_002324774.1|	Populus trichocarpa ubiquitin-conjugating enzyme family protein (POPTR_0018s00610g) mRNA, complete cds	Q8LGF7	Protein PEROXIN-4	.	.	pfam00179	UQ_con	Ubiquitin-conjugating enzyme. Proteins destined for proteasome-mediated degradation may be ubiquitinated. Ubiquitination follows conjugation of ubiquitin to a conserved cysteine residue of UBC homologues. TSG101 is one of several UBC homologues that lacks this active site cysteine.	GO:0006635|fatty acid beta-oxidation;GO:0007031|peroxisome organization;GO:0016558|protein import into peroxisome matrix;GO:0016567|protein ubiquitination;	GO:0005737|cytoplasm;GO:0005778|peroxisomal membrane;	GO:0005524|ATP binding;GO:0016874|ligase activity;GO:0061630|ubiquitin protein ligase activity;GO:0031625|ubiquitin protein ligase binding;GO:0004842|ubiquitin-protein transferase activity;	K10689	PEX4; peroxin-4 [EC:2.3.2.23]
Potri.018G096700	protein_coding	Chr18:12515873-12524172:-	gi|224143809|ref|XP_002325082.1|	diacylglycerol kinase family protein [Populus trichocarpa]	gi|566215178|ref|XM_002325046.2|	Populus trichocarpa diacylglycerol kinase family protein (POPTR_0018s10570g) mRNA, complete cds	Q8VZG1	Diacylglycerol kinase 3	.	.	pfam00609	DAGK_acc	Diacylglycerol kinase accessory domain. Diacylglycerol (DAG) is a second messenger that acts as a protein kinase C activator. This domain is assumed to be an accessory domain: its function is unknown.	GO:0006952|defense response;GO:0007205|protein kinase C-activating G-protein coupled receptor signaling pathway;	GO:0016020|membrane;GO:0005886|plasma membrane;GO:0009506|plasmodesma;	GO:0005524|ATP binding;GO:0004143|diacylglycerol kinase activity;	K00901	dgkA, DGK; diacylglycerol kinase (ATP) [EC:2.7.1.107]
Potri.018G107300	protein_coding	Chr18:13356690-13360482:-	gi|224143955|ref|XP_002325136.1|	eukaryotic translation initiation factor 5A isoform V family protein [Populus trichocarpa]	gi|566215343|ref|XM_002325100.2|	Populus trichocarpa eukaryotic translation initiation factor 5A isoform V family protein (POPTR_0018s11660g) mRNA, complete cds	Q9AXJ4	Eukaryotic translation initiation factor 5A	YJR047c	COG0231	pfam01287	eIF-5a	Eukaryotic elongation factor 5A hypusine, DNA-binding OB fold. eIF5A, previously thought to be an initiation factor, has been shown to be required for peptide chain elongation in yeast.	GO:0045901|positive regulation of translational elongation;GO:0045905|positive regulation of translational termination;GO:0006452|translational frameshifting;	.	GO:0043022|ribosome binding;GO:0003746|translation elongation factor activity;GO:0003743|translation initiation factor activity;	.	.
Potri.018G110800	protein_coding	Chr18:13686996-13688648:-	gi|118489173|gb|ABK96393.1|	unknown [Populus trichocarpa x Populus deltoides]	gi|566215394|ref|XM_002325111.2|	Populus trichocarpa hypothetical protein (POPTR_0018s11910g) mRNA, complete cds	Q46036	Outer membrane lipoprotein Blc	STM4339	COG3040	pfam08212	Lipocalin_2	Lipocalin-like domain. Lipocalins are transporters for small hydrophobic molecules, such as lipids, steroid hormones, bilins, and retinoids. The structure is an eight-stranded beta barrel.	.	GO:0009279|cell outer membrane;	GO:0008289|lipid binding;GO:0005215|transporter activity;	.	.
